# Supplementary material
Source: publisher site journal article supplement (https://www.dovepress.com/article/519660)
Supplement: Supplementary file 1 [file Supplementary%20table%201.docx]

**Supplementary Table 1**

Eighteen effective chemical constituents of *Flos Puerariae* screened in TCMSP database

| Mol ID | Molecule Name | OB | DL |
| --- | --- | --- | --- |
| MOL011791 | Kakkalide | 46.91 | 0.67 |
| MOL011793 | kakkatin | 55.25 | 0.24 |
| MOL000359 | sitosterol | 36.91 | 0.75 |
| MOL000392 | formononetin | 69.67 | 0.21 |
| MOL000422 | kaempferol | 41.88 | 0.24 |
| MOL000449 | Stigmasterol | 43.83 | 0.76 |
| MOL005916 | irisolidone | 37.78 | 0.30 |
| MOL008400 | glycitein | 50.48 | 0.24 |
| MOL000098 | quercetin | 46.43 | 0.28 |
| MOL000468 | 8-o-Methylreyusi | 70.32 | 0.27 |
| MOL001749 | ZINC03860434 | 43.59 | 0.35 |
| MOL001792 | DFV | 32.76 | 0.18 |
| MOL002959 | 3'-Methoxydaidzein | 48.57 | 0.24 |
| MOL003629 | Daidzein-4,7-diglucoside | 47.27 | 0.67 |
| MOL004957 | HMO | 38.37 | 0.21 |
| MOL012976 | coumestrol | 32.49 | 0.34 |
| MOL013305 | Garbanzol | 83.67 | 0.21 |
